# Supplementary material for: Magnetic and Fluorescent Dual-Labeled Genetically Encoded Targeted Nanoparticles for Malignant Glioma Cell Tracking and Drug Delivery
Source: MDPI journal article supplement (doi:10.3390/pharmaceutics15102422), 2023-10-04
Supplement: s1 [file s1]

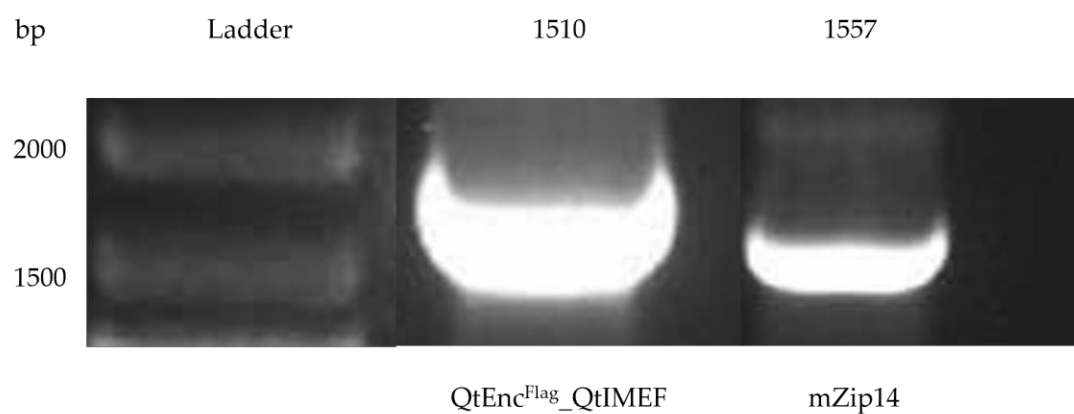

**Figure S1.** Reverse transcription-polymerase chain reaction analysis of HT1080-Qt cells.

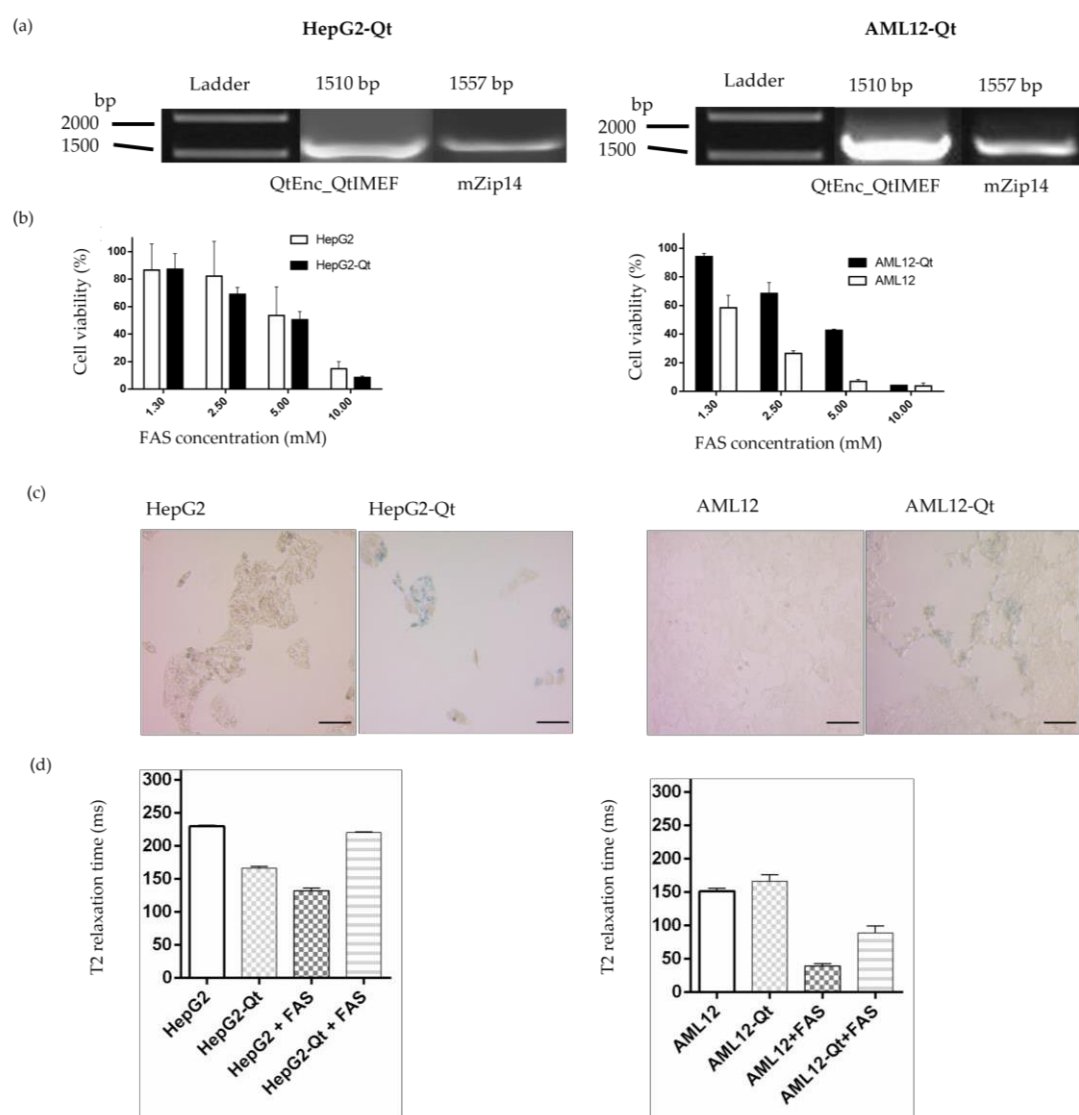

**Figure S2.** Iron biomineralization in Qt encapsulin genes containing cell lines: RT-PCR (a), viability assay (b), Prussian blue staining of cells after incubation with 2 mM FAS for 24 h (c) and MRI (d) analysis of HepG2-Qt and AML12-Qt cell lines.

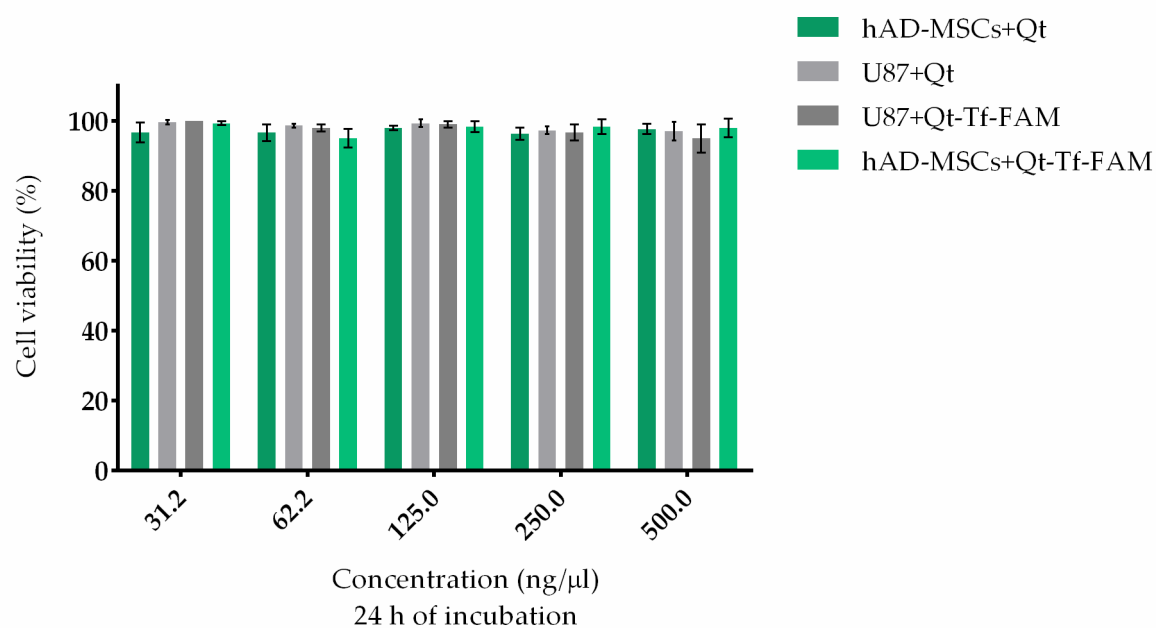

**Figure S3.** Resazurin assay evaluating the cytotoxicity of Qt and Qt-Tf-FAM in various concentrations in U87 cells and hMSCs.
